# Supplementary material for: A thicker, rather than thinner, East Antarctic Ice Sheet plateau during the Last Glacial Maximum
Source: Copernicus journal article supplement (doi:10.5194/egusphere-2024-2674), 2024-09-26
Supplement: Supplementary file 1 [file egusphere-2024-2674-supplement.pdf]

1 **Table S1: Sample-measurement details**

| Sample number | TUCNL | AMS ID    | Quartz (g) | Carbon yield ( $\mu\text{g}$ ) | Carbon-yield uncertainty ( $\mu\text{g}$ ) | Diluted carbon ( $\mu\text{g}$ ) | $^{14}\text{C}/^{13}\text{C}$ | $^{14}\text{C}/^{13}\text{C}$ uncertainty | $\delta^{13}\text{C}$ (per mille) | $^{14}\text{C}/\text{C}_{\text{total}}$ | $^{14}\text{C}/\text{C}_{\text{total}}$ uncertainty |
|---------------|-------|-----------|------------|--------------------------------|--------------------------------------------|----------------------------------|-------------------------------|-------------------------------------------|-----------------------------------|-----------------------------------------|-----------------------------------------------------|
| GR01          | 761   | OS-163393 | .6034      | 3.4                            | 0.04                                       | 115.3                            | 1.98E-12                      | 5.83E-14                                  | -2.69                             | 1.90E-14                                | 5.59E-16                                            |
| GR03          | 762   | OS-163394 | 5.01112    | 21.1                           | 0.3                                        | 115                              | 2.33E-12                      | 2.77E-13                                  | -4.17                             | 2.53E-13                                | 3.01E-15                                            |
| GR04          | 763   | OS-163397 | 5.3835     | 66                             | 0.8                                        | 116.6                            | 4.65E-11                      | 2.04E-13                                  | -5.04                             | 5.08E-13                                | 2.24E-15                                            |
| GR06          | 764   | OS-163398 | 5.186      | 35                             | 0.4                                        | 115.6                            | 5.17E-11                      | 2.04E-13                                  | -5.56                             | 5.65E-13                                | 2.24E-15                                            |
| GR07          | 723   | OS-161685 | 1.1181     | 7.4                            | 0.1                                        | 113.6                            | 1.56E-11                      | 7.29E-14                                  | -4.58                             | 1.68E-13                                | 7.89E-16                                            |
| GR12(BR)      | 724   | OS-161686 | 2.4832     | 10.1                           | 0.1                                        | 115                              | 5.64E-12                      | 4.37E-14                                  | -4.28                             | 5.91E-14                                | 4.59E-16                                            |
| GR13          | 765   | OS-167939 | 5.2367     | 23.6                           | 0.3                                        | 114.4                            | 1.44E-11                      | 1.02E-13                                  | -3.92                             | 1.55E-13                                | 1.10E-15                                            |
| GR15(BR)      | 735   | OS-162192 | 5.0494     | 35.5                           | 0.5                                        | 116                              | 2.32E-12                      | 5.83E-14                                  | -6.00                             | 2.27E-14                                | 5.71E-16                                            |
| GR18          | 725   | OS-161687 | 5.1754     | 25                             | 0.3                                        | 115.7                            | 4.56E-11                      | 1.75E-13                                  | -4.60                             | 4.98E-13                                | 1.92E-15                                            |
| GR21(BR)      | 741   | OS-162198 | 5.2501     | 41.2                           | 0.5                                        | 116                              | 6.51E-11                      | 3.06E-13                                  | -4.88                             | 7.12E-13                                | 3.36E-15                                            |

2

3 **Table of sample-measurement details. All sample concentrations corrected by subtracting a  $0.58 \pm 0.31 \times 10^4$  atom blank. Where the  $1 \sigma$  [ $^{14}\text{C}$ ] uncertainty and 6% [ $^{14}\text{C}$ ] uncertainty differ, the larger uncertainty value is used. “Internal”  $^{14}\text{C}$ -age uncertainty includes only instrumental uncertainty. “External”  $^{14}\text{C}$ -age uncertainty includes both instrumental and production-rate uncertainties. All Al and Be data from Lilly (2008; PhD thesis) and Lilly *et al.* (2010).**

6

7

8

9

10

11

12 **Table S1: Sample-measurement details (continued)**

| Blank-corrected total $^{14}\text{C}^*$ ( $10^4$ atoms) | Blank-corrected total- $^{14}\text{C}$ uncertainty ( $10^3$ atoms) | $[^{14}\text{C}]$ ( $10^5$ atoms/g) | $1\sigma$ $[^{14}\text{C}]$ uncertainty ( $10^3$ atoms/g) | 6% $[^{14}\text{C}]$ uncertainty ( $10^3$ atoms/g) | $^{14}\text{C}$ Age (ka) | Internal $^{14}\text{C}$ -age uncertainty (ka) | External $^{14}\text{C}$ -age uncertainty (ka) | Effective-blank proportion of total $^{14}\text{C}$ (%) | $^{10}\text{Be}/^9\text{Be}$ ratio ( $10^{-15}$ ) | $^{10}\text{Be}/^9\text{Be}$ -ratio uncertainty (%) |
|---------------------------------------------------------|--------------------------------------------------------------------|-------------------------------------|-----------------------------------------------------------|----------------------------------------------------|--------------------------|------------------------------------------------|------------------------------------------------|---------------------------------------------------------|---------------------------------------------------|-----------------------------------------------------|
| 5.2                                                     | 4.70                                                               | 0.86                                | 7.79                                                      | 5.16                                               | 1.006                    | 0.097                                          | 0.098                                          | 52.8                                                    | $1,585 \pm 64$                                    | 4                                                   |
| 140.0                                                   | 25.69                                                              | 2.8                                 | 5.13                                                      | 16.8                                               | 3.983                    | 0.308                                          | 0.32                                           | 4.0                                                     | 16,303                                            | 0.9                                                 |
| 291.3                                                   | 40.35                                                              | 5.41                                | 7.5                                                       | 32.46                                              | 11.004                   | 1.387                                          | 1.442                                          | 2.0                                                     | $12,062 \pm 142$                                  | 1.2                                                 |
| 321.5                                                   | 43.98                                                              | 6.2                                 | 8.48                                                      | 37.2                                               | 14.615                   | 2.425                                          | 2.521                                          | 1.8                                                     | $2,812 \pm 50$                                    | 1.8                                                 |
| 90.0                                                    | 13.44                                                              | 8.05                                | 12.02                                                     | 48.3                                               | Saturated                | N/A                                            | N/A                                            | 6.1                                                     | $25,652 \pm 348$                                  | 1.4                                                 |
| 28.3                                                    | 5.98                                                               | 1.14                                | 2.41                                                      | 6.84                                               | 1.371                    | 0.09                                           | 0.093                                          | 17.1                                                    | $7,650 \pm 100$                                   | 1.3                                                 |
| 83.2                                                    | 13.39                                                              | 1.59                                | 2.56                                                      | 9.54                                               | 1.989                    | 0.135                                          | 0.141                                          | 6.6                                                     | $1,681 \pm 22$                                    | 1.3                                                 |
| 7.4                                                     | 4.85                                                               | 0.15                                | 0.96                                                      | 0.9                                                | 0.019                    | 0.013                                          | 0.013                                          | 44.0                                                    | $8,746 \pm 127$                                   | 1.4                                                 |
| 282.9                                                   | 38.74                                                              | 5.47                                | 7.48                                                      | 32.82                                              | 11.6                     | 1.53                                           | 1.59                                           | 2.1                                                     | $9,037 \pm 85$                                    | 0.9                                                 |
| 408.5                                                   | 56.63                                                              | 7.78                                | 10.79                                                     | 46.68                                              | Saturated                | N/A                                            | N/A                                            | 1.4                                                     | $21,477 \pm 250$                                  | 1.2                                                 |

13

14 **Table of sample-measurement details (continued).**

15

16

17

18

19

20

21 **Table S1: Sample-measurement details (continued)**

| $[^{10}\text{Be}]$ ( $10^6$<br>atoms [g<br>quartz] $^{-1}$ ) | $[^{10}\text{Be}]$<br>uncertainty<br>(%) | $^{26}\text{Al}/^{27}\text{Al}$<br>ratio ( $10^{-15}$ ) | $^{26}\text{Al}/^{27}\text{Al}$ -<br>ratio<br>uncertainty<br>(%) | $[^{26}\text{Al}]$ ( $10^6$<br>atoms [g<br>quartz] $^{-1}$ ) | $[^{26}\text{Al}]$<br>uncertain<br>ty (%) |
|--------------------------------------------------------------|------------------------------------------|---------------------------------------------------------|------------------------------------------------------------------|--------------------------------------------------------------|-------------------------------------------|
| $1.53 \pm 0.07$                                              | 4.5                                      | $2,060 \pm 84$                                          | 4.1                                                              | $7.2 \pm 1.5$                                                | 2.0                                       |
| $7.44 \pm 0.16$                                              | 2.2                                      | $21,317 \pm 382$                                        | 1.8                                                              | $49.8 \pm 3.1$                                               | 6.3                                       |
| $9.45 \pm 0.22$                                              | 2.3                                      | $35,266 \pm 431$                                        | 1.2                                                              | $50 \pm 10$                                                  | 2.0                                       |
| $3.15 \pm 0.08$                                              | 2.7                                      | $7,824 \pm 199$                                         | 2.5                                                              | $15.4 \pm 3.1$                                               | 2.0                                       |
| $17.8 \pm 0.4$                                               | 2.4                                      | $51,037 \pm 593$                                        | 1.2                                                              | $96 \pm 19$                                                  | 2.0                                       |
| $8.49 \pm 0.20$                                              | 2.4                                      | $24,625 \pm 496$                                        | 2                                                                | $39.5 \pm 1.8$                                               | 4.5                                       |
| $1.53 \pm 0.04$                                              | 2.4                                      | $5,520 \pm 267$                                         | 4.8                                                              | $10.1 \pm 0.6$                                               | 6.3                                       |
| $11.5 \pm 0.3$                                               | 2.5                                      | $30,658 \pm 401$                                        | 1.3                                                              | $54.0 \pm 2.3$                                               | 4.2                                       |
| $5.58 \pm 0.12$                                              | 2.2                                      | $13,500 \pm 398$                                        | 3                                                                | $57.8 \pm 1.4$                                               | 5.0                                       |
| $22.6 \pm 0.5$                                               | 2.3                                      | $47,386 \pm 561$                                        | 1.2                                                              | $107 \pm 4$                                                  | 4.2                                       |

22

23 **Table of sample-measurement details (continued).**24 **References**

25 Lilly, K.: Three million years of East Antarctic ice sheet history from in situ cosmogenic nuclides in the Lambert-Amery Basin, 2008. 2008.

26 Lilly, K., Fink, D., Fabel, D., and Lambeck, K.: Pleistocene dynamics of the interior East Antarctic ice sheet, *Geology*, 38, 703-706, 2010.
